# Supplementary material
Source: Elsevier journal article supplement (https://git.physik.uzh.ch/gitbucket/mchrzasz/Lecture_repo/raw/9321cb9d482613e3ecfab8fd361efd31f1fa9bed/Lectures_others/MC/W_Placzek_2010/mmc12.pdf)
Supplement: mmc12 [file mmc12.pdf]

# Zastosowanie metod Monte Carlo w zagadnieniach optymalizacji

- **Wstęp.**
- **Metoda „orzeł–reszka”.**
- **Metody sekwencyjne.**
  - ▷ **Algorytm podstawowy i jego zbieżność.**
  - ▷ **Algorytm Charłamowa.**
- **Inne metody.**
- **Rozwiązywanie układów równań liniowych metodą minimalizacji formy kwadratowej.**

## Zagadnienie optymalizacji

Dany jest zbiór  $X \subset \mathbb{R}^m$  i funkcja  $F : X \rightarrow \mathbb{R}$ .

Niech  $x = (x^1, x^2, \dots, x^m) \in X$ .

► Zadanie: **Znaleźć taki punkt**

$$x_{\text{opt}} \in X : \forall x \in X \quad F(x) \geq F(x_{\text{opt}}).$$

▷ Zagadnienie to różni się od zwykłego zagadnienia szukania minimum funkcji  $F$  tym, że poszukiwania wartości minimalnej ograniczone są do zbioru  $X$ , co ma zasadnicze znaczenie przy konstrukcji odpowiednich algorytmów obliczeniowych.

► **Metody Monte Carlo szukania  $x_{\text{opt}}$ :**

- **Metoda „orzeł–reszka”** – najprostsza, ale zarazem najmniej wydajna.
- **Metody sekwencyjne** – probabilistyczny odpowiednik metod kolejnych przybliżeń.
- **Inne metody:** optymalizacja statystyczna, algorytmy genetyczne.

Schemat obliczeń:

1. Losujemy niezależnie  $N$  punktów  $x_1, x_2, \dots, x_N \in X$  według rozkładu  $P$  równomiernego na  $X$  (zakładamy, że jest to możliwe).
2. Obliczamy wartość funkcji  $F$  w każdym punkcie  $x_1, x_2, \dots, x_N$ :

$$F_1 = F(x_1), \quad F_2 = F(x_2), \quad \dots, \quad F_N = F(x_N).$$

3. Znajdujemy:  $F^* = \min \{F_1, F_2, \dots, F_N\}$

► Za rozwiązanie przyjmujemy punkt:  $x_j : F(x_j) = F^*$

▷ Przeanalizujemy dokładność i wydajność tego algorytmu.

Jeżeli  $\{x_k\}$ ,  $k = 1, 2, \dots, N$  – ciąg niezależnych zmiennych losowych o wartościach w zbiorze  $X$  i jednakowym rozkładzie  $P$ , to ciąg  $\{F_k = F(x_k)\}$ ,  $k = 1, 2, \dots, N$ , jest również ciągiem niezależnych zmiennych losowych o jednakowym rozkładzie z pewną dystrybuantą:

$$G(f) = \mathcal{P}\{F_j < f\},$$

która może być wyrażona za pomocą rozkładu  $P$ :

$$G(f) = P\{x_j \in \mathcal{F}(f)\}, \quad \text{gdzie } \mathcal{F}(f) \equiv \{x \in X : F(x) < f\}.$$

Ozn.  $g$  – gęstość zmiennej losowej  $F_j$ , tzn.  $g(f) = dG(f)/df$ .

Niech

$$F^* = \min_{1 \leq j \leq N} F_j.$$

Dla zmiennej losowej  $G(F^*)$  mamy:

$$\mathcal{P}\{G(F^*) < \gamma\} = \mathcal{P}\{F^* < G^{-1}(\gamma)\}, \quad 0 < \gamma \leq 1.$$

▷ Ponieważ  $F^*$  jest statystyką pozycyjną próbki losowej  $F_1, F_2, \dots, F_N$ , to (patrz podręczniki rachunku prawdopodobieństwa i statystyki matematycznej):

$$\begin{aligned} \mathcal{P}\{F^* < G^{-1}(\gamma)\} &= N \int_{-\infty}^{G^{-1}(\gamma)} [1 - G(x)]^{N-1} g(x) dx \\ &= N \int_0^\gamma (1 - u)^{N-1} du = 1 - (1 - \gamma)^N. \end{aligned}$$

► Na podstawie powyższych wzorów otrzymujemy:

$$\mathcal{P}\{P\{x \in \mathcal{F}(F^*)\} < \gamma\} = 1 - (1 - \gamma)^N.$$

Ponieważ  $P$  jest rozkładem równomiernym na  $X$ , to

$$P\{x \in \mathcal{F}(F^*)\} \underset{\text{ozn.}}{=} \mathcal{V}^*(x) \leq 1$$

może być interpretowane jako objętość (miara) zbioru takich punktów  $x$ , dla których  $F(x) < F^*$ .

► **Wniosek:**

**Jeżeli  $F^* = \min_{1 \leq j \leq N} \{F(x_j)\}$ , gdzie  $x_j, j = 1, 2, \dots, N$ , są punktami wylosowanymi według rozkładu równomiernego na zbiorze  $X$ , to z prawdopodobieństwem  $1 - (1 - \gamma)^N$  objętość zbioru tych  $x$ , dla których  $F(x) < F^*$ , jest mniejsza od  $\gamma$ .**

▷ Mówimy, że z prawdopodobieństwem  $1 - (1 - \gamma)^N$  punkt  $x_{\text{opt}}$  został zlokalizowany z dokładnością do zbioru o objętości mniejszej od  $\gamma$ .

⇒ Im mniejsza ta objętość, tym lepsza lokalizacja  $x_{\text{opt}}$ !

→ W szczególności dla  $F^* = F(x_{\text{opt}})$  mamy  $\mathcal{V}^*(x) = 0$ .

● Ile punktów  $x$  należy wylosować, aby z prawdopodobieństwem co najmniej  $1 - \epsilon$  punkt  $x_{\text{opt}}$  został zlokalizowany z dokładnością do zbioru o objętości mniejszej od  $\gamma$ ?

► Na podstawie powyższego mamy:

$$N_{\min} = \min\{N : 1 - (1 - \gamma)^N \geq 1 - \epsilon\}.$$

Najmniejsze liczby  $N$  spełniające nierówność:  $1 - (1 - \gamma)^N \geq 1 - \epsilon$

| $\gamma$ | $1 - \epsilon$ |       |       |       |       |        |
|----------|----------------|-------|-------|-------|-------|--------|
|          | 0.5            | 0.9   | 0.95  | 0.99  | 0.999 | 0.9999 |
| 0.5      | 1              | 4     | 5     | 7     | 10    | 14     |
| 0.1      | 7              | 22    | 29    | 44    | 66    | 88     |
| 0.05     | 14             | 45    | 59    | 90    | 135   | 180    |
| 0.01     | 69             | 230   | 299   | 459   | 688   | 917    |
| 0.001    | 693            | 2302  | 2995  | 4603  | 6905  | 9206   |
| 0.0001   | 6932           | 23025 | 29956 | 46050 | 69075 | 92099  |

▷ Przykład: Niech  $X = [0, 1]^m$  i  $F : X \rightarrow \mathbb{R}$ .

Ile trzeba wylosować punktów, aby z prawdopodobieństwem 0.9 zlokalizować minimum tej funkcji z dokładnością do połowy zakresu zmienności każdego z argumentów?

- Dla  $m = 1$ :  $\gamma = 1/2 \Rightarrow N = 4$ ;
- Dla  $m = 2$ :  $\gamma = 1/4 \Rightarrow N = 9$ ;
- Dla  $m = 14$ :  $\gamma = 2^{-14} < 10^{-4} \Rightarrow N > 23\,000$ .

► **Metoda niewydajna w wielu wymiarach!**

## Ogólny schemat algorytmów sekwencyjnych:

1. Ustalić punkt początkowy  $x_1 \in X$ , np. wylosować z pewnego rozkładu prawdopodobieństwa na zbiorze  $X$ .
2. Jeżeli już wylosowano punkty  $x_1, x_2, \dots, x_n$ , sprawdzić czy spełnione są określone warunki zwane **regułą stopu (RS)**.
  - Jeżeli TAK – zakończyć obliczenia i punkt  $x_n$  przyjąć za rozwiązanie zadania.
  - Jeżeli NIE – wylosować punkt  $x_{n+1}$  według rozkładu prawdopodobieństwa zależnego od tego, jakie punkty został już wylosowane i od wartości funkcji  $F$  w tych punktach.

## ► Podstawowy algorytm sekwencyjny:

1. Ustalamy punkt początkowy  $x_1$ .
2. Jeżeli wyznaczyliśmy już punkty  $x_1, x_2, \dots, x_n$ , to losujemy pomocniczy punkt  $\xi_n$  według rozkładu  $P_n$  i obliczamy:

$$x_{n+1} = \begin{cases} x_n, & \text{jeżeli } F(x_n + \xi_n) \geq F(x_n) - \epsilon, \\ x_n + \xi_n, & \text{jeżeli } F(x_n + \xi_n) < F(x_n) - \epsilon, \end{cases}$$

gdzie  $\epsilon$  jest pewną stałą dodatnią.

Zakładamy, że  $\{\xi_n\}$  jest ciągiem niezależnych zmiennych losowych oraz, że  $x_n + \xi_n \in X$ .

Stosując powyższy algorytm otrzymujemy ciąg punktów  $\{x_n\}$  takich, że:

$$F(x_1) \geq F(x_2) \geq F(x_3) \geq \dots \geq F(x_n) \geq F(x_{n+1}) \geq \dots$$

- ▷ Jeżeli funkcja  $F$  jest ograniczona od dołu, to ciąg powyższy jest zbieżny.
- ▶ Czy ciąg  $\{x_n\}$  jest również zbieżny, a jeżeli tak, to czy jego granicą jest punkt  $x_{\text{opt}}$ ?

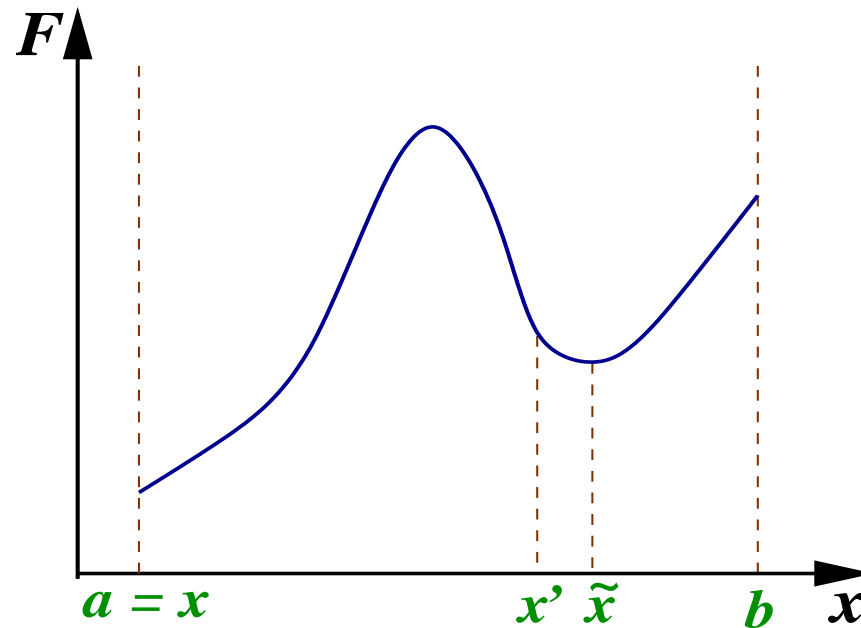

Przykład funkcji posiadającej minimum lokalne w punkcie  $\tilde{x}$ .

- ▷ Przy odpowiednim wyborze rozkładów  $P_n$ , każdy ciąg zaczynający się np. w punkcie  $x_1 = x'$  będzie zbieżny do punktu  $\tilde{x}$ , w którym funkcja  $F$  ma **minimum lokalne**, a nie do punktu  $x_{\text{opt}}$ , w którym funkcja ta osiąga **minimum globalne** na zbiorze  $X = [a, b]$ !



Algorytmy dające ciągi  $\{x_n\}$  zbieżne do  $x_{\text{opt}}$ , w którym funkcja  $F$  osiąga wartość najmniejszą nazywają się **algorytmami globalnymi**, natomiast algorytmy generujące ciągi  $\{x_n\}$ , z których niektóre są zbieżne do  $x_{\text{opt}}$ , a inne do jednego z minimów lokalnych funkcji  $F$  zwane są **algorytmami lokalnymi**.

▷ Jeżeli w ciągu  $\{x_n\}$  pojawi się punkt  $x'$ , dla którego

$$F(x_{\text{opt}}) < F(x') < F(x_{\text{opt}}) + \epsilon,$$

to zgodnie w powyższym algorytmem będzie powtarzał się w ciągu  $\{x_n\}$  nieskończenie wiele razy, tzn. dla takiego ciągu

$$\lim_{k \rightarrow \infty} x_k = x'.$$

→ Oczywiście, zmieniając wartość  $\epsilon$  możemy dostawać różne wartości  $x'$ .

Niech:

$$A_\epsilon = \{x : F(x) < F(x_{\text{opt}}) + \epsilon\}.$$

► Będziemy mówić, że ciąg  $\{x_n\}$  jest zbieżny do  $x_{\text{opt}}$ , jeżeli jest on zbieżny do jakiegokolwiek punktu zbioru  $A_\epsilon$ .

- **Twierdzenie Drimla–Hanša:**

**Jeżeli funkcja  $F$  jest ograniczona od dołu i jeżeli**

$$\forall x \in X \text{ i } \forall \delta > 0: \mathcal{P}\{F(x + \xi_n) \leq F(x_{\text{opt}}) + \delta\} > 0,$$

**to ciąg  $\{x_n\}$  z prawdopodobieństwem 1 osiągnie zbiór  $A_\epsilon$ .**

▷ Tezę powyższego twierdzenia można też sformułować w następujący sposób:

**Ciąg  $\{x_n\}$  jest z prawdopodobieństwem 1 zbieżny do zmiennej losowej  $\bar{x}$  takiej, że:**

$$\mathcal{P}\{F(\bar{x}) < F(x_{\text{opt}}) + \epsilon\} = 1.$$

► **Problem praktyczny:**

Założenie tw. Drimla–Hanša jest spełnione, gdy nośnikiem każdego rozkładu  $P_n$  jest cały zbiór  $X$  (skonstruowanie innego rozkładu jest trudne w praktyce).

→ Słaba wydajność algorytmu, ponieważ za każdym razem losujemy punkt z całego zbioru  $X$ !

▷ Lepszą wydajność uzyskalibyśmy losując punkt  $x_{n+1}$  w bliskim otoczeniu najlepszego z dotychczas wylosowanych punktów  $x_n$ , co jest równoważne losowaniu  $\xi_n$  blisko zera (w praktyce  $\xi_n$  losuje się często z rozkładu równomiernego na sferze o promieniu  $r_n$ ).

- **Twierdzenie Zielińskiego:**

Jeżeli dla każdego punktu  $x \in X \setminus A_\epsilon$  (tzn. dla każdego punktu spoza zbioru  $A_\epsilon$ ) spełniony jest warunek:

$$\mathcal{P}\{F(x + \xi_n) < F(x) - \epsilon\} > 0,$$

to ciąg  $\{x_n\}$  z prawdopodobieństwem 1 osiągnie zbiór  $A_\epsilon$ .

- ▶ **Wnioski:**

- Rozkłady  $P_n$  nie mogą być zbyt „skupione” wokół zera.
- Jeżeli są na tyle „rozmyte”, że dla każdego punktu  $x$  istotnie różnego od  $x_{\text{opt}}$  (tzn. spoza zbioru  $A_\epsilon$ ) istnieje dodatnie prawdopodobieństwo wylosowania punktu  $x'$  takiego, że

$$F(x') < F(x) - \epsilon,$$

to warunek powyższego twierdzenia jest spełniony i generowane przez opisany algorytm ciągi  $\{x_n\}$  są zbieżne do  $x_{\text{opt}}$  (w sensie sformułowanym powyżej).

- ▷ Porównamy pod względem **efektywności** powyższy sekwencyjny algorytm Monte Carlo ze standardową metodą gradientową.

## Metoda gradientowa:

Niech

$$dF_j(x) = F(x^1, x^2, \dots, x^{j-1}, x^j + h, x^{j+1}, \dots, x^m) \\ - F(x^1, x^2, \dots, x^{j-1}, x^j, x^{j+1}, \dots, x^m)$$

będzie przyrostem funkcji  $F$  przy zmianie jej  $j$ -tej współrzędnej z  $x^j$  na  $x^j + h$ .

Różnicowy odpowiednik gradientu funkcji  $F$  definiujemy jako:

$$dF(x) = \beta [dF_1(x), dF_2(x), \dots, dF_m(x)] ,$$

gdzie współczynnik  $\beta$  ustalamy tak, aby wektor  $dF(x)$  miał jednostkową długość.

### ► Schemat obliczeń:

Jeżeli wyznaczyliśmy już punkty  $x_1, x_2, \dots, x_n$ , to punkt  $x_{n+1}$  znajdujemy według wzoru:

$$x_{n+1} = x_n + dF(x_n) .$$

- ▷ Załóżmy, że w danym otoczeniu punktu  $x_n$  funkcja  $F$  może być dostatecznie dobrze aproksymowana pewną płaszczyzną (dla prostoty rozważań).

→ Punkt  $x_{n+1}$  znajduje się o jednostkę bliżej punktu  $x_{\text{opt}}$  niż punkt  $x_n$ .

► W wyniku wykonania jednego kroku w metodzie gradientowej uzyskujemy przesunięcie w kierunku minimum funkcji  $F$  o jedną jednostkę.

▷ Jakie przesunięcie uzyskamy w sekwencyjnym algorytmie Monte Carlo?

Rozważmy wariant tego algorytmu, w którym  $\epsilon = 0$ , a punkt  $\xi_n$  losujemy według rozkładu równomiernego na sferze jednostkowej o środku w początku układu współrzędnych.

► Punkt  $x_{n+1}$  wyznaczamy według wzoru:

$$x_{n+1} = \begin{cases} x_n, & \text{jeżeli } F(x_n + \xi_n) \geq F(x_n), \\ x_n + \xi_n, & \text{jeżeli } F(x_n + \xi_n) < F(x_n). \end{cases}$$

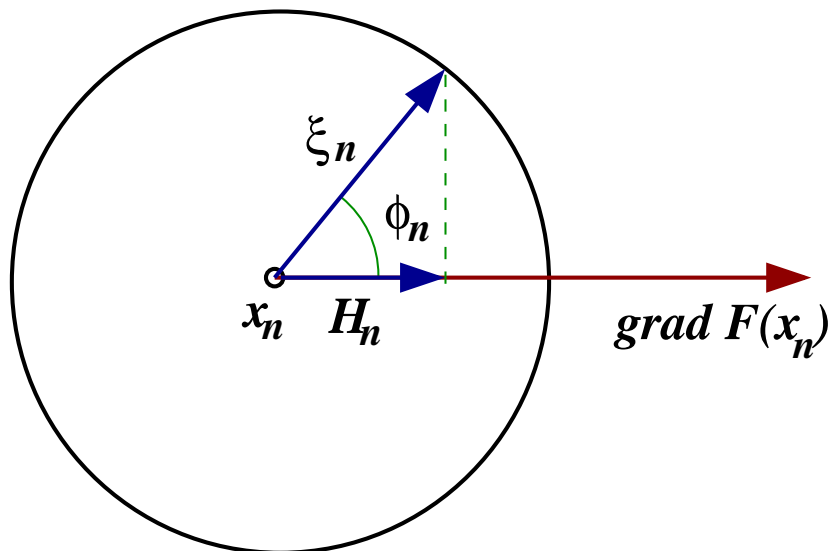

▷ Przesunięcie  $H_n$  w kierunku minimum funkcji  $F$  jest zmienną losową:

$$H_n = \begin{cases} \cos \phi_n, & -\pi/2 \leq \phi_n \leq \pi/2, \\ 0, & \text{poza tym,} \end{cases}$$

czyli jest rzutem wektora  $\xi_n$  na kierunek gradientu funkcji  $F$ , jeżeli kąt między tymi wektorami jest bezwzględnie mniejszy od  $\pi/2$ .

- ▶ Powtarzając losowanie  $(m + 1)$  razy otrzymamy ciąg punktów:

$$x_n, x_{n+1}, x_{n+2}, \dots, x_{n+m}$$

i odpowiadający mu ciąg przesunięć:

$$H_n, H_{n+1}, H_{n+2}, \dots, H_{n+m}.$$

- **Przesunięciem jednostkowym w algorytmie stochastycznym** nazwiemy wielkość:

$$H(m) = \sum_{j=0}^m H_{n+j}.$$

- ▷ Wymaga takiej samej liczby obliczeń wartości funkcji  $F$  jak przesunięcie jednostkowe w metodzie gradientowej.

- ▶ **Wartość oczekiwana** tego przesunięcia wynosi:

$$E[H(m)] = (m + 1) E[H_n] = (m + 1) \int_{-\pi/2}^{\pi/2} \cos \phi w_m(\phi) d\phi,$$

gdzie  $w_m(\phi)$  jest gęstością rozkładu kąta  $\phi$  w przestrzeni  $m$ -wymiarowej.

► Ponieważ:

$$w_m(\phi) = C_m \sin^{m-2} \phi,$$

to ostatecznie na **wartość oczekiwaną** otrzymujemy wyrażenie:

$$E[H(m)] = \frac{(m+1) \Gamma(m)}{2^m \Gamma^2\left(\frac{m+1}{2}\right)}.$$

▷ Podstawiając w powyższym wzorze kolejne liczby naturalne otrzymujemy:

$$E[H(1)] = 1, E[H(2)] = 3/\pi, E[H(3)] = 1, E[H(4)] = 10/3\pi, E[H(5)] = 9/8, \dots$$

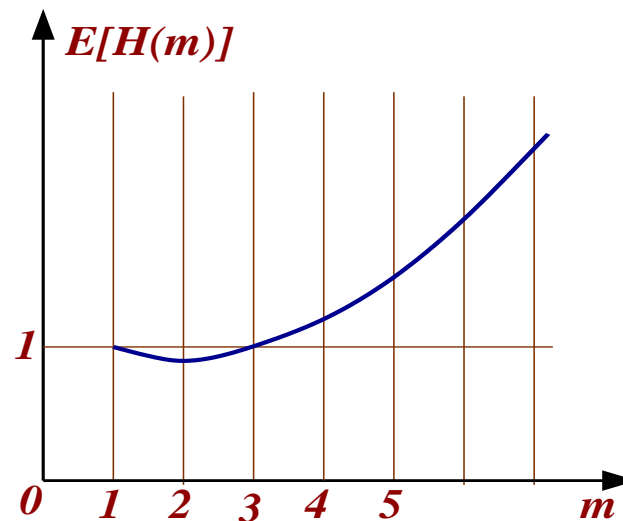

⇒ **Wartość oczekiwana przesunięcia w kierunku minimum funkcji  $F$  w powyższym algorytmie stochastycznym jest dla  $m > 3$  większa niż przesunięcie w metodzie gradientowej!**

▷ Prosty przykład: Szukamy minimum funkcji  $F$  na przedziale  $[a, b]$  używając dwóch metod:

1. Losujemy punkty na przedziale  $[a, b]$  według rozkładu równomiernego o gęstości  $f_1$ .
2. Losujemy punkty na przedziale  $[a, b]$  według rozkładu o gęstości  $f_2$  skupionego wokół mniejszych wartości funkcji  $F$ .

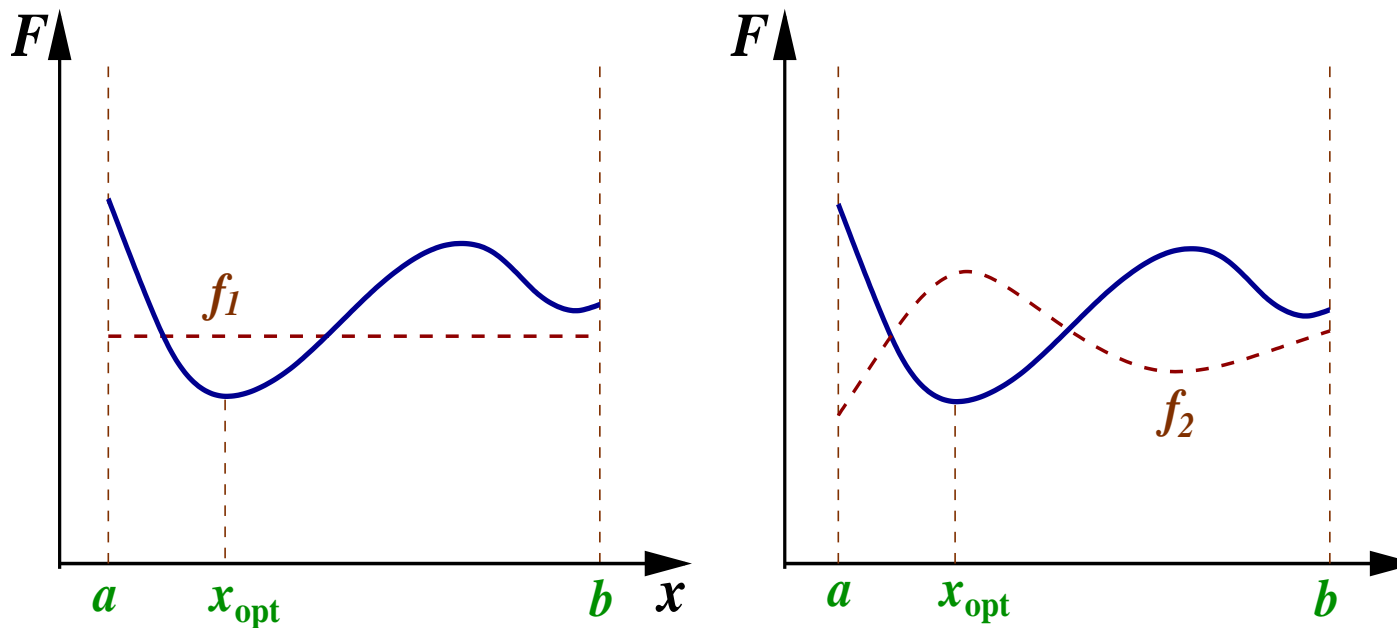

▷ Intuicyjnie spodziewamy się, że losowanie według rozkładu  $f_2$  daje większe szanse trafienia w pobliże punktu  $x_{opt}$ , a zatem metoda nr 2 powinna być wydajniejsza.

► Formalnie wyraża się to poprzez wartości oczekiwane:

$$E_1 = \int_a^b F(x) f_1(x) dx > E_2 = \int_a^b F(x) f_2(x) dx .$$



Niech  $r$  będzie malejącą funkcją odwzorowującą zbiór wartości funkcji  $F$  w przedział  $(0, 1)$ .

## Schemat obliczeń:

1. Położenie początkowe  $x_1$  cząsteczki  $C$  wybieramy dowolnie.
2. Jeżeli w pewnej chwili  $n$  cząsteczka znajduje się w punkcie  $x_n$ , to jej położenie  $x_{n+1}$  w chwili  $(n + 1)$  wybieramy w następujący sposób:
  - Z prawdopodobieństwem  $r(F(x_n))$  cząsteczka pozostaje w punkcie  $x_n$ , tzn.  $x_{n+1} = x_n$ .
  - Z prawdopodobieństwem  $1 - r(F(x_n))$  cząsteczka przechodzi do nowej pozycji  $x_{n+1}$  w zbiorze  $X$ , którą losujemy według pewnego rozkładu prawdopodobieństwa.

### ► Bardziej formalnie:

Jeżeli w pewnej chwili cząsteczka  $C$  jest w punkcie  $x \in X$ , to z prawdopodobieństwem

$$P(S|x) = \begin{cases} r(F(x)) + [1 - r(F(x))] Q(S), & x \in S, \\ [1 - r(F(x))] Q(S), & x \in X \setminus S \end{cases}$$

znajdzie się w pewnym punkcie zbioru  $S$ .

$Q$  jest ustalonym rozkładem prawdopodobieństwa (np. rozkładem równomiernym) na  $X$ .

Niech  $x_1, x_2, \dots$  będzie ciągiem kolejnych położenia cząsteczki  $C$  w zbiorze  $X$ , a  $f_1(x), f_2(x), \dots$  ciągiem rozkładów zmiennych losowych  $x_1, x_2, \dots$

- ▶ Ciąg  $\{x_n\}$  jest zbieżny do  $x_{\text{opt}}$  w tym sensie, że ciąg  $\{f_n\}$  jest zbieżny do pewnego rozkładu granicznego  $f$  skupionego wokół punktu  $x_{\text{opt}}$ .
- ▷ Jeżeli funkcja  $r$  zostanie tak dobrana, że  $r(F(x_{\text{opt}})) = 1$ , to cały rozkład graniczny  $f$  skupiony jest w punkcie  $x_{\text{opt}}$ .

Założmy, że mamy dwa algorytmy tego typu:

Niech  $f^{(1)}$  – rozkład graniczny ciągów rozkładów  $\{f_n\}$  w algorytmie pierwszym,  
a  $f^{(2)}$  – rozkład graniczny w algorytmie drugim.

- ▶ Algorytm pierwszy uznamy za bardziej efektywny, jeżeli:

$$\int_X F(x) f^{(1)}(x) dx < \int_X F(x) f^{(2)}(x) dx.$$

Algorytm Charłamowa jest procedurą sekwencyjnego budowania rozkładu granicznego skupionego wokół minimum funkcji  $F$  w oparciu o losowe błędzenie cząsteczki  $C$  po zbiorze  $X$ .

- ▷ Problemem może być odpowiedni wybór funkcji  $r$ .

- **Optymalizacja statystyczna:**

W niektórych zagadnieniach optymalizacyjnych wartość funkcji może być obliczona w każdym punkcie, ale formuła opisująca funkcję jest nieznana.

Np. wartości funkcji  $F$  są wartościami zaobserwowanymi empirycznie dla odpowiednio dobranych parametrów produkcyjnych  $x^1, x^2, \dots, x^m$ .

▷ Patrz np.: R. Zieliński, „*Metody Monte Carlo*”, WNT 1970.

- **Algorytmy genetyczne** – stanowią przypadek szczególny stochastycznych algorytmów optymalizacji globalnej.

Stosują one mechanizmy adaptacji rozkładu prawdopodobieństwa w kolejnych krokach iteracji zapożyczone z biologii – oparte na zjawiskach mutacji i krzyżowania kodów genetycznych oraz selekcji naturalnej organizmów żywych. Ukierunkowują one proces poszukiwania, czyniąc go bardziej efektywnym niż poszukiwanie całkowicie przypadkowe.

▶ Sprawdzają się w zastosowaniu do funkcji wielu zmiennych, skomplikowanych, nieregularnych itd.

▷ Więcej szczegółów np. w książce:

R. Schaefer, „*Podstawy genetycznej optymalizacji globalnej*”, Wydawnictwo Uniwersytetu Jagiellońskiego, Kraków 2002.

Zadanie rozwiązania układu równań liniowych:

$$\mathbf{A} \vec{x} = \vec{b}, \quad \vec{x}, \vec{b} \in \mathbb{R}^n, \quad \mathbf{A} \in \mathbb{R}^n \times \mathbb{R}^n,$$

można traktować jako zadanie znalezienia **minimum** funkcji  $n$  zmiennych (**formy kwadratowej**):

$$f(\vec{x}) = f(x_1, x_2, \dots, x_n) = \sum_{i=1}^n \left( \sum_{j=1}^n a_{ij} x_j - b_i \right)^2.$$

## ► Najprostsza metoda Monte Carlo:

1. Wybrać dowolnie punkt początkowy  $\vec{x}^{(1)}$ .
2. Jeżeli wyznaczone zostały już punkty  $\vec{x}^{(1)}, \vec{x}^{(2)}, \dots, \vec{x}^{(k)}$ , to wylosować punkt  $\vec{\xi}$  według rozkładu równomiernego na sferze o środku w punkcie  $\vec{x}^{(k)}$  i promieniu  $r^{(k)}$  ( $r^{(k)} \xrightarrow[k \rightarrow \infty]{} 0$ ).
3. Wyznaczyć:

$$\vec{x}^{(k+1)} = \begin{cases} \vec{\xi}, & \text{gdy } f(\vec{\xi}) < f(\vec{x}^{(k)}), \\ \vec{x}^{(k)}, & \text{gdy } f(\vec{\xi}) \geq f(\vec{x}^{(k)}). \end{cases}$$

- Jeżeli spełnione są warunki tw. Drimla–Hanša lub tw. Zielińskiego, to tak skonstruowany ciąg punktów  $\{\vec{x}^{(k)}\}$  jest z prawdopodobieństwem 1 zbieżny do rozwiązania  $\vec{x}^0$ .
